# Supplementary material
Source: PubMed Central journal article supplement (PMC6039244)
Supplement: NIHMS969717-supplement-1.pdf [file NIHMS969717-supplement-1.pdf]

A.

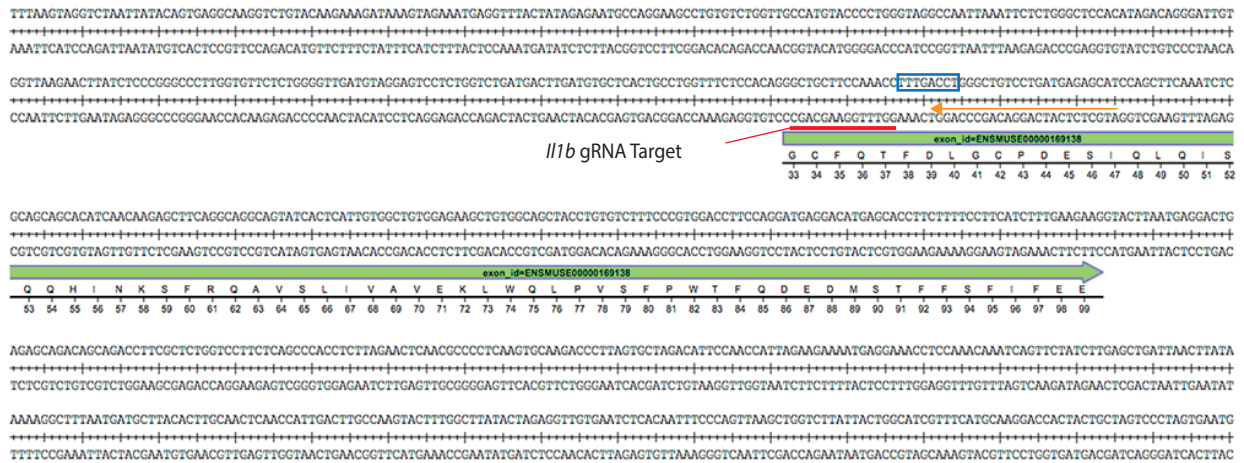

B.

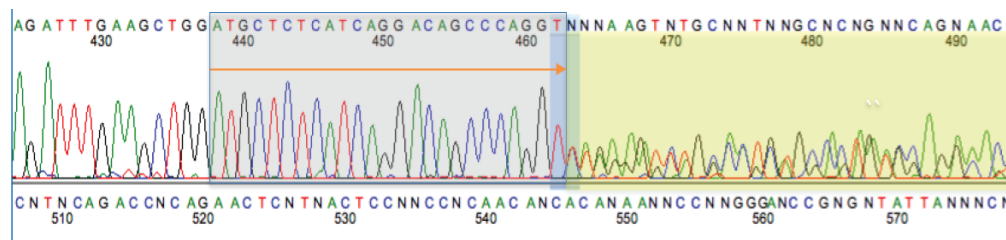

C.

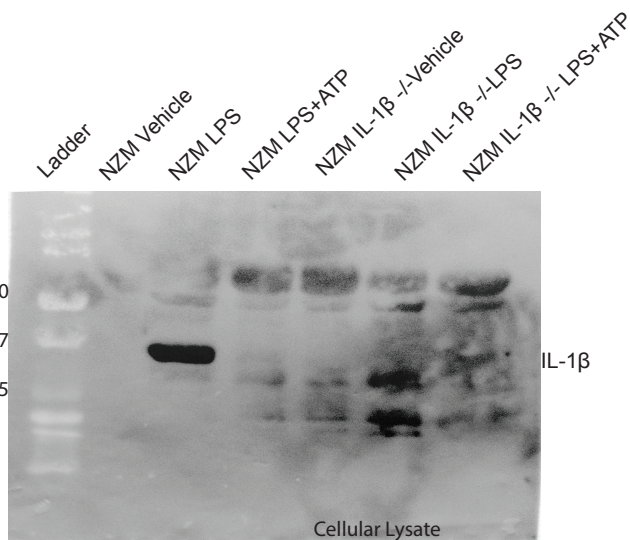

D.

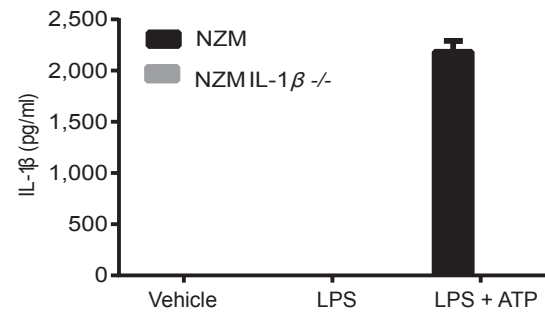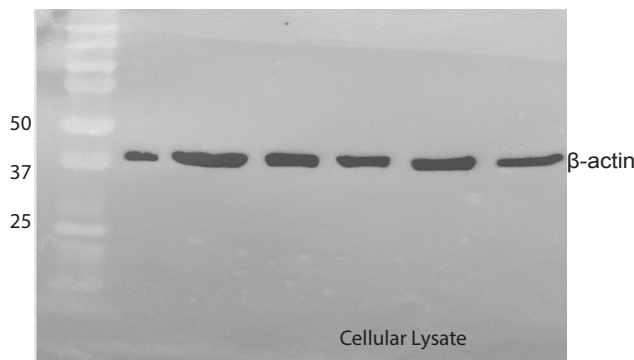

Supplementary Figure 1. Generation of IL-1 $\beta$  -/- mice

A. Diagram showing the *Il1b* gene guide RNA target (red line) and resulting 8bp deletion (blue box) of *Il1b*. B. Sanger sequencing demonstrating loss of homozygosity in *il1b* exon (marked by orange arrow in A and B) in *il1b*+/+ progeny. Confirmation of an 8-bp deletion (AGGTCAA) was made via bi-directional sequencing of cloned amplicons. (C and D) BMDMs from 10 week-old NZM 2328 and NZM IL-1 $\beta$  KO mice were stimulated with or without 1 $\mu$ g LPS for 4 hours followed by activation of the inflammasome with or without 5mM ATP for 1 hr. C. Western blot of cellular lysates showing pro-IL-1 $\beta$  (31kDa) upregulation in NZM but not IL-1 $\beta$  -/- cells after LPS treatment. Active IL-1 $\beta$  was secreted and detected in D.  $\beta$ -actin (42kDa) is shown on the bottom. D. [IL-1 $\beta$ ] in the media of BMDMs from C. was analyzed via ELISA. No secreted IL-1 $\beta$  was detected from NZMIL-1 $\beta$  -/- mice.

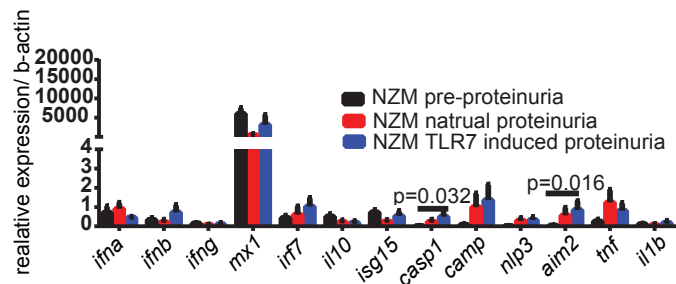

Supplementary Figure 2. Changes in inflammatory response genes in TLR7-induced nephritis vs. natural nephritis  
 RNA was isolated from the kidney of 10 weeks-old NZM2328 mice stimulated with R848 until proteinuria(4+ by dipstick) development, from NZM2328 mice that naturally developed proteinuria (4+ by dipstick) at around 35 weeks of age, and NZM2328 mice that were pre-proteinuric (trace by dipstick). Real-time PCR was completed for analysis of the genes listed. Graphs display the mean+ SD for each gene as compared to the average of β-actin. n=4 for R848 treated, n=5 for aged NZM mice and n=5 for NZM pre-proteinuric mice. p<0.05 is considered significant via unpaired T test.
